# Supplementary material for: 海のピラミッド : 構造評論(構造パースペクティブ)
Source: MDPI journal article supplement (doi:10.3390/cancers15184528), 1991-05-20
Supplement: s1 [file s1]

Supplementary files

# Study of *Helicobacter pylori* Isolated from a High-Gastric-Cancer-Risk Population: Unveiling the Comprehensive Analysis of Virulence-Associated Genes Including Secretion Systems, and Genome-wide Association Study

Batsaikhan Saruuljavkhlan <sup>1</sup>, Ricky Indra Alfaray <sup>1,2</sup>, Khasag Oyuntsetseg <sup>3</sup>, Boldbaatar Gantuya <sup>3,4</sup>, Ayush Khangai <sup>1</sup>, Renchinsengee Namsrai <sup>1</sup>, Takashi Matsumoto <sup>1</sup>, Junko Akada <sup>1</sup>, Dashdorj Azzaya <sup>4</sup>, Duger Davaadorj <sup>4</sup>, and Yoshio Yamaoka <sup>1,2,5,6\*</sup>

<sup>1</sup> Department of Environmental and Preventive Medicine, Oita University Faculty of Medicine, Yufu, Oita 879-5593, Japan; saruuljavkhlan@yahoo.com (B.S.); rickyindraalfaray@gmail.com (R.I.A.); m20d9103@oita-u.ac.jp (A.K.); m22d9105@oita-u.ac.jp (R.N.); tmatsumoto9@oita-u.ac.jp (T.M.); akadajk@oita-u.ac.jp (J.A.);

<sup>2</sup> *Helicobacter pylori* and Microbiota Study Group, Institute of Tropical Disease, Universitas Airlangga, Surabaya, East Java 60286, Indonesia

<sup>3</sup> Endoscopy Center, Mongolia Japan Hospital, Mongolian National University of Medical Sciences, Ulaanbaatar 14210, Mongolia; oyuntsetseg.kh@mnums.edu.mn (K.O.), gantuya@mnums.edu.mn (B.G.)

<sup>4</sup> Department of Gastroenterology and Hepatology, Mongolian National University of Medical Sciences, Ulaanbaatar 14210, Mongolia; azzaya2000@gmail.com (D.A.); davaadorj@mnums.edu.mn (D.D.);

<sup>5</sup> The Research Center for GLOBAL and LOCAL Infectious Diseases (RCGLID), Oita University, Yufu, Oita 870-1192, Japan

<sup>6</sup> Department of Medicine, Gastroenterology and Hepatology Section, Baylor College of Medicine, Houston, Texas 77030, USA

\* Correspondence: yyamaoka@oita-u.ac.jp; Tel.: +81-97-586-5740; Fax: +81-97-586-5749

**Table S1.** The gene list of HpVAG dataset

| No                                | Gene locus by 26,695 | Gene name              | Gene function                                                                           | Functional groups             |
|-----------------------------------|----------------------|------------------------|-----------------------------------------------------------------------------------------|-------------------------------|
| <b>Virulence associated genes</b> |                      |                        |                                                                                         |                               |
| 1                                 | HP0243               | <i>nap</i>             | Neutrophil-activating protein                                                           | Binding or transport proteins |
| 2                                 | HP0298               | <i>ddpA</i>            | Periplasmic dipeptide-binding protein                                                   | Binding or transport proteins |
| 3                                 | HP0508               | <i>pgbA</i>            | Plasminogen-binding protein A                                                           | Binding or transport proteins |
| 4                                 | HP0888/HP0889        | <i>HP0888</i>          | Iron (III) dicitrate ABC transporter, ATP-binding protein                               | Binding or transport proteins |
| 6                                 | HP0970               | <i>nccB</i>            | Nickel-cobalt-cadmium import protein B                                                  | Binding or transport proteins |
| 7                                 | HP1073               | <i>copP</i>            | Copper-binding protein P                                                                | Binding or transport proteins |
| 8                                 | HP1252               | <i>oppA</i>            | Oligopeptide ABC transporter periplasmic oligopeptide-binding protein A                 | Binding or transport proteins |
| 9                                 | HP1286               | <i>HP1286</i>          | Ycel-like acidic stress response, lipocalin                                             | Binding or transport proteins |
| 10                                | HP1561/HP1562        | <i>ceuE</i>            | ABC transporter periplasmic binding protein E                                           | Binding or transport proteins |
| 12                                | HP0019               | <i>cheV1</i>           | Chemotaxis coupling protein V1                                                          | flagellar component           |
| 13                                | HP0115               | <i>flaB</i>            | Flagellin B                                                                             | flagellar component           |
| 14                                | HP0173               | <i>fliR</i>            | Export component/flagellar biosynthetic protein R                                       | flagellar component           |
| 15                                | HP0178 <sup>a</sup>  | <i>pseI</i>            | Pseudaminic acid synthase                                                               | flagellar component           |
| 16                                | HP0244               | <i>flgS</i>            | Signal-transducing protein, histidine kinase                                            | flagellar component           |
| 17                                | HP0246               | <i>flgI</i>            | P-ring protein; part of bushing; internal disulfide bridge                              | flagellar component           |
| 18                                | HP0256               | <i>fliJ</i>            | General chaperone                                                                       | flagellar component           |
| 19                                | HP0295               | <i>flgL</i>            | Hook-associated protein 3; second hook-filament junction protein                        | flagellar component           |
| 20                                | HP0325               | <i>flgH</i>            | L-ring protein; part of bushing; lipoprotein                                            | flagellar component           |
| 21                                | HP0326 <sup>a</sup>  | <i>pseFG</i>           | CMP-N-acetylneuraminic acid synthetase                                                  | flagellar component           |
| 22                                | HP0327 <sup>a</sup>  | <i>flaG1/pseH/flmH</i> | Flagellar protein G homolog 1, Pseudaminic acid biosynthesis protein H                  | flagellar component           |
| 23                                | HP0351               | <i>fliF</i>            | MS-ring protein; mounting flange for rotor/switch and rod; housing for export apparatus | flagellar component           |
| 24                                | HP0352               | <i>fliG</i>            | Rotor/switch protein; torque generation; strong interaction with MS ring                | flagellar component           |
| 25                                | HP0353               | <i>fliH</i>            | Flagellar assembly protein H                                                            | flagellar component           |
| 26                                | HP0366               | <i>pseC</i>            | Polysaccharide biosynthesis protein C                                                   | flagellar component           |
| 27                                | HP0391               | <i>cheW</i>            | Chemotaxis coupling protein W                                                           | flagellar component           |
| 28                                | HP0392 <sup>a</sup>  | <i>cheA</i>            | Chemotaxis protein A                                                                    | flagellar component           |
| 29                                | HP0393               | <i>cheV2</i>           | Chemotaxis coupling protein V2                                                          | flagellar component           |
| 30                                | HP0492 <sup>a</sup>  | <i>HP_RS02435</i>      | Neuraminylactose-binding hemagglutinin                                                  | flagellar component           |
| 31                                | HP0518               | <i>cds6</i>            | L, D-carboxypeptidase                                                                   | flagellar component           |
| 32                                | HP0584               | <i>fliN</i>            | Flagellar rotor/switch protein N                                                        | flagellar component           |
| 33                                | HP0599               | <i>cheV3</i>           | Chemotaxis coupling protein V3                                                          | flagellar component           |
| 34                                | HP0601               | <i>flaA</i>            | Flagellin A                                                                             | flagellar component           |
| 35                                | HP0616 <sup>a</sup>  | <i>cheV2</i>           | Chemotaxis protein V2                                                                   | flagellar component           |
| 36                                | HP0685               | <i>fliP</i>            | Flagellar biosynthetic protein P                                                        | flagellar component           |
| 37                                | HP0703               | <i>flgR</i>            | Transcriptional activator of flagellar proteins R                                       | flagellar component           |
| 38                                | HP0714 <sup>a</sup>  | <i>rpoN</i>            | RNA polymerase factor sigma-54                                                          | flagellar component           |

|    |                     |                   |                                                                |                       |
|----|---------------------|-------------------|----------------------------------------------------------------|-----------------------|
| 39 | HP0751              | <i>flaG</i>       | Flagellar protein G                                            | flagellar component   |
| 40 | HP0752              | <i>fliD</i>       | Flagellar hook-associated protein D                            | flagellar component   |
| 41 | HP0753              | <i>fliS</i>       | Flagellar protein S                                            | flagellar component   |
| 42 | HP0770              | <i>flhB</i>       | Flagellar biosynthetic protein B                               | flagellar component   |
| 43 | HP0809              | <i>fliL</i>       | Flagellar basal body protein L                                 | flagellar component   |
| 44 | HP0815              | <i>motA</i>       | Flagellar motor rotation protein A                             | flagellar component   |
| 45 | HP0816              | <i>motB</i>       | Flagellar motor rotation protein B                             | flagellar component   |
| 46 | HP0840              | <i>flaA1</i>      | FlaA1 protein                                                  | flagellar component   |
| 47 | HP0870              | <i>flgE_1</i>     | Flagellar hook protein E1                                      | flagellar component   |
| 48 | HP0907              | <i>flgD</i>       | Hook-capping protein D                                         | flagellar component   |
| 49 | HP0908              | <i>flgE</i>       | Flagellar hook protein E                                       | flagellar component   |
| 50 | HP0958 <sup>a</sup> | <i>flgZ</i>       | Zinc ribbon domain-containing protein                          | flagellar component   |
| 51 | HP1030              | <i>fliY</i>       | Flagellar motor switch protein Y                               | flagellar component   |
| 52 | HP1031              | <i>fliM</i>       | Flagellar motor switch protein M (target for CheY-P binding)   | flagellar component   |
| 53 | HP1032              | <i>fliA</i>       | Flagellar biosynthesis sigma factor A                          | flagellar component   |
| 54 | HP1034              | <i>ylxH</i>       | Flagellum site-determining protein H                           | flagellar component   |
| 55 | HP1035              | <i>flhF</i>       | Flagellar biosynthesis protein                                 | flagellar component   |
| 56 | HP1041              | <i>flhA</i>       | Export component; target for soluble export complex            | flagellar component   |
| 57 | HP1067              | <i>cheY</i>       | Chemotaxis response regulator Y                                | flagellar component   |
| 58 | HP1092              | <i>flgG</i>       | Flagellar basal-body rod protein G                             | flagellar component   |
| 59 | HP1119              | <i>flgK</i>       | Flagellar hook-associated protein 1 K                          | flagellar component   |
| 60 | HP1122              | <i>flgM</i>       | Negative regulator of flagellin synthesis, anti-sigma28 factor | flagellar component   |
| 61 | HP1274              | <i>pflA</i>       | Paralysed flagella protein                                     | flagellar component   |
| 62 | HP1419              | <i>fliQ</i>       | Flagellar export component Q                                   | flagellar component   |
| 63 | HP1420              | <i>fliI</i>       | Flagellar export protein ATP synthase                          | flagellar component   |
| 64 | HP1462 <sup>a</sup> | <i>HP_RS07240</i> | META domain-containing protein                                 | flagellar component   |
| 65 | HP1477              | <i>flgA</i>       | Chaperone for P-ring protein Y                                 | flagellar component   |
| 66 | HP1557              | <i>fliE</i>       | Flagellar basal-body protein E                                 | flagellar component   |
| 67 | HP1558              | <i>flgC</i>       | Flagellar basal-body rod protein C; transmission shaft         | flagellar component   |
| 68 | HP1559              | <i>flgB</i>       | Flagellar basal-body rod protein B; transmission shaft         | flagellar component   |
| 69 | HP1575              | <i>flhB2</i>      | ABC transporter, homolog of FlhB protein                       | flagellar component   |
| 70 | HP1582              | <i>pdxJ</i>       | Pyridoxal phosphate biosynthetic protein J                     | flagellar component   |
| 71 | HP1583              | <i>pdxA</i>       | Pyridoxal phosphate biosynthetic protein A                     | flagellar component   |
| 72 | HP1585 <sup>a</sup> | <i>flgG_2</i>     | Flagellar protein G homolog 2, Distal rod protein              | flagellar component   |
| 73 | HP0122              | <i>HP0122</i>     | Hypothetical uncharacterized protein                           | Hypothetical proteins |
| 74 | HP0129              | <i>HP0129</i>     | Hypothetical uncharacterized protein                           | Hypothetical proteins |
| 75 | HP0130              | <i>HP0130</i>     | Hypothetical uncharacterized protein                           | Hypothetical proteins |
| 76 | HP0135              | <i>HP0135</i>     | Hypothetical uncharacterized protein                           | Hypothetical proteins |
| 77 | HP0149              | <i>HP0149</i>     | Hypothetical uncharacterized protein                           | Hypothetical proteins |
| 78 | HP0169              | <i>HP0169</i>     | Hypothetical secreted collagenase                              | Hypothetical proteins |
| 79 | HP0204              | <i>HP0204</i>     | Hypothetical uncharacterized protein                           | Hypothetical proteins |
| 80 | HP0367              | <i>HP0367</i>     | Hypothetical uncharacterized protein                           | Hypothetical proteins |
| 81 | HP0555              | <i>HP0555</i>     | Hypothetical uncharacterized protein                           | Hypothetical proteins |
| 82 | HP0659              | <i>HP0659</i>     | Hypothetical uncharacterized protein                           | Hypothetical proteins |
| 83 | HP0719              | <i>HP0719</i>     | Hypothetical uncharacterized protein                           | Hypothetical proteins |
| 84 | HP0720 <sup>a</sup> | <i>HP0720</i>     | Hypothetical protein                                           | Hypothetical proteins |
| 85 | HP0721              | <i>HP0721</i>     | Sialic acid-specific adhesion, metal homeostasis               | Hypothetical proteins |
| 86 | HP0781              | <i>HP0781</i>     | Hypothetical uncharacterized protein                           | Hypothetical proteins |
| 87 | HP0783              | <i>HP0783</i>     | Hypothetical uncharacterized protein                           | Hypothetical proteins |

|     |                     |                  |                                                            |                                              |
|-----|---------------------|------------------|------------------------------------------------------------|----------------------------------------------|
| 88  | HP0902              | HP0902           | Hypothetical uncharacterized protein                       | Hypothetical proteins                        |
| 89  | HP0953              | HP0953           | Hypothetical uncharacterized protein                       | Hypothetical proteins                        |
| 90  | HP0973              | HP0973           | Hypothetical uncharacterized protein                       | Hypothetical proteins                        |
| 91  | HP1023              | HP1023           | Hypothetical uncharacterized protein                       | Hypothetical proteins                        |
| 92  | HP1055              | HP1055           | Hypothetical uncharacterized protein                       | Hypothetical proteins                        |
| 93  | HP1056              | HP1056           | Hypothetical uncharacterized protein                       | Hypothetical proteins                        |
| 94  | HP1057              | HP1057           | Hypothetical uncharacterized protein                       | Hypothetical proteins                        |
| 95  | HP1173              | HP1173           | Hypothetical uncharacterized protein                       | Hypothetical proteins                        |
| 96  | HP1285              | HP1285           | Lipoprotein, e(P4) family                                  | Hypothetical proteins                        |
| 97  | HP1454              | HP1454           | Hypothetical uncharacterized protein                       | Hypothetical proteins                        |
| 98  | HP1527              | HP1527           | Hypothetical uncharacterized protein                       | Hypothetical proteins                        |
| 99  | HP1580              | HP1580           | Hypothetical uncharacterized protein                       | Hypothetical proteins                        |
| 100 | HP0043              | <i>rfbM</i>      | Mannose-6-phosphate isomerase                              | Immune modulation                            |
| 101 | HP0044              | <i>rfbD/gmd</i>  | GDP-D-mannose dehydratase                                  | Immune modulation                            |
| 102 | HP0045              | <i>wbcJ</i>      | GDP fucose synthase                                        | Immune modulation                            |
| 103 | HP0159              | <i>rfaJ</i>      | Alpha-1,6 Glc transferase                                  | Immune modulation                            |
| 104 | HP0279              | <i>rfaC/waaC</i> | Lipopolysaccharide heptosyltransferase-1                   | Immune modulation                            |
| 105 | HP0360              | <i>gluE/galE</i> | UDP-glucose 4-epimerase                                    | Immune modulation                            |
| 106 | HP0679              | <i>wbpB</i>      | Lipopolysaccharide biosynthesis protein B                  | Immune modulation                            |
| 107 | HP0867              | <i>lpxB</i>      | Lipid A disaccharide synthetase B                          | Immune modulation                            |
| 108 | HP1174              | <i>gluP</i>      | Glucose/galactose transporter/sugar MFS transporter P      | Immune modulation                            |
| 109 | HP1416 <sup>a</sup> | HP_RS07005       | Alpha-1,2/4 Glc transferase                                | Immune modulation                            |
| 110 | HP1475              | <i>kdtB</i>      | Lipopolysaccharide core biosynthesis protein               | Immune modulation                            |
| 111 | HP0004              | <i>icfA</i>      | Carbonic anhydrase                                         | Other enzymes                                |
| 112 | HP0010              | <i>hspA</i>      | Chaperone and heat shock protein, HspR-dependent regulon A | Other enzymes                                |
| 113 | HP0011              | <i>hspB</i>      | Cochaperone, HspR-dependent regulon B                      | Other enzymes                                |
| 114 | HP0026              | <i>gltA</i>      | Citrate synthase                                           | Other enzymes                                |
| 115 | HP0154              | <i>eno</i>       | Enolase                                                    | Other enzymes                                |
| 116 | HP0166              | <i>arsS</i>      | Response regulator S                                       | Other enzymes                                |
| 117 | HP0194              | <i>tpiA</i>      | Triosephosphate isomerase A                                | Other enzymes                                |
| 118 | HP0275              | <i>addB</i>      | ATP-dependent nuclease B                                   | Other enzymes                                |
| 119 | HP0294              | <i>aimE</i>      | Aliphatic amidase E                                        | Other enzymes                                |
| 120 | HP0305              | HP0305           | Putative human regulator of G protein signaling 12         | Other enzymes                                |
| 121 | HP0310              | HP0310           | Polysaccharide deacetylase                                 | Other enzymes                                |
| 122 | HP0323              | <i>nuc</i>       | Membrane-bound endonuclease                                | Other enzymes                                |
| 123 | HP0380              | HP0380           | Glutamate dehydrogenase                                    | Other enzymes                                |
| 124 | HP0672              | <i>aspB</i>      | Aspartate aminotransferase B                               | Other enzymes                                |
| 125 | HP0743              | HP0743           | Rod shape-determining protein                              | Other enzymes                                |
| 126 | HP0827              | HP0827           | ssDNA-binding 12RNP2 precursor                             | Other enzymes                                |
| 127 | HP0835              | HP0835           | Histone-like DNA-binding protein HU                        | Other enzymes                                |
| 128 | HP1000              | HP1000           | PARA protein                                               | Other enzymes                                |
| 129 | HP1118              | HP1118           | $\gamma$ -Glutamyltranspeptidase                           | Other enzymes                                |
| 130 | HP1126              | <i>tolB</i>      | Colicin tolerant protein B                                 | Other enzymes                                |
| 131 | HP1178              | HP1178           | Purine nucleoside phosphorylase DeoD-type                  | Other enzymes                                |
| 132 | HP1186              | HP1186           | Carbonic anhydrase                                         | Other enzymes                                |
| 133 | HP1202              | HP1202           | Ribosomal protein L11                                      | Other enzymes                                |
| 134 | HP1375              | <i>lpxA</i>      | UDP-N-acetylglucosamine acyltransferase                    | Other enzymes                                |
| 135 | HP1432              | <i>hpn2</i>      | Hpn-like protein (Nickel-binding protein L)                | Other enzymes                                |
| 136 | HP0175              | <i>surA</i>      | Secreted peptide-based proline cis-trans isomerase         | Outer membrane biogenesis complex components |
| 137 | HP0320              | <i>tatA</i>      | Sec-independent protein translocase protein A              | Outer membrane biogenesis complex components |

|     |               |                    |                                                                                                             |                                              |
|-----|---------------|--------------------|-------------------------------------------------------------------------------------------------------------|----------------------------------------------|
| 138 | HP0362        | <i>lptF</i>        | Integral membrane protein F                                                                                 | Outer membrane biogenesis complex components |
| 139 | HP0378        | <i>bamD</i>        | Outer membrane-associated lipoprotein D                                                                     | Outer membrane biogenesis complex components |
| 140 | HP0655        | <i>bamA</i>        | Outer membrane $\beta$ -barrel assembly component A                                                         | Outer membrane biogenesis complex components |
| 141 | HP0715        | <i>lptB</i>        | Outer membranes lipopolysaccharide transport protein Inner membrane ATP-binding-cassette transporter domain | Outer membrane biogenesis complex components |
| 142 | HP0763        | <i>ftsY</i>        | SRP receptor                                                                                                | Outer membrane biogenesis complex components |
| 143 | HP0785        | <i>lolA</i>        | Periplasmic chaperone A                                                                                     | Outer membrane biogenesis complex components |
| 144 | HP0786        | <i>secA</i>        | Preprotein translocase subunit A                                                                            | Outer membrane biogenesis complex components |
| 145 | HP0787        | <i>lolC (lolE)</i> | Integral membrane protein E                                                                                 | Outer membrane biogenesis complex components |
| 146 | HP1060        | <i>tatB</i>        | Sec-independent translocase B                                                                               | Outer membrane biogenesis complex components |
| 147 | HP1061        | <i>tatC</i>        | Sec-independent translocase C                                                                               | Outer membrane biogenesis complex components |
| 148 | HP1082        | <i>msbA</i>        | Inner membrane LPS flippase                                                                                 | Outer membrane biogenesis complex components |
| 149 | HP1152        | <i>ffh</i>         | Signal recognition particle (SRP)                                                                           | Outer membrane biogenesis complex components |
| 150 | HP1203        | <i>secE</i>        | Preprotein translocase subunit E                                                                            | Outer membrane biogenesis complex components |
| 151 | HP1216        | <i>lptD</i>        | Outer membranes lipopolysaccharide transport protein D                                                      | Outer membrane biogenesis complex components |
| 152 | HP1255        | <i>secG</i>        | Preprotein translocase subunit                                                                              | Outer membrane biogenesis complex components |
| 153 | HP1300        | <i>secY</i>        | Preprotein translocase subunit                                                                              | Outer membrane biogenesis complex components |
| 155 | HP1498        | <i>lptG</i>        | Outer membranes lipopolysaccharide transport protein G, integral membrane protein                           | Outer membrane biogenesis complex components |
| 156 | HP1540        | <i>yidC</i>        | Inner membrane protein translocase component C                                                              | Outer membrane biogenesis complex components |
| 157 | HP1546        | <i>lptE</i>        | Outer membranes lipopolysaccharide transport protein E                                                      | Outer membrane biogenesis complex components |
| 158 | HP1549        | <i>secF</i>        | Preprotein translocase subunit F                                                                            | Outer membrane biogenesis complex components |
| 159 | HP1550        | <i>secD</i>        | Preprotein translocase subunit D                                                                            | Outer membrane biogenesis complex components |
| 160 | HP1551        | <i>yajC</i>        | Preprotein translocase subunit C                                                                            | Outer membrane biogenesis complex components |
| 161 | HP1568        | <i>lptA</i>        | Outer membranes lipopolysaccharide transport protein A, Periplasmic chaperone                               | Outer membrane biogenesis complex components |
| 162 | HP1569        | <i>lptC</i>        | Outer membranes lipopolysaccharide transport protein C                                                      | Outer membrane biogenesis complex components |
| 163 | HP0570        | <i>pepA</i>        | Aminopeptidase A                                                                                            | Proteases                                    |
| 164 | HP0657        | <i>ymxG</i>        | Processing protease                                                                                         | Proteases                                    |
| 165 | HP1012        | <i>HP1012</i>      | Putative Zinc protease                                                                                      | Proteases                                    |
| 166 | HP1018/HP1019 | <i>htrA</i>        | Secreted serine protease and chaperone high temperature requirement A                                       | Proteases                                    |
| 167 | HP1037        | <i>HP1037</i>      | Amino peptidase                                                                                             | Proteases                                    |
| 168 | HP1350        | <i>HP1350</i>      | Carboxyl-terminal protease                                                                                  | Proteases                                    |
| 169 | HP0160        | <i>hcpD</i>        | <i>H. pylori</i> cysteine-rich protein D                                                                    | Putative solenoid proteins                   |

|     |               |                            |                                                          |                                                |
|-----|---------------|----------------------------|----------------------------------------------------------|------------------------------------------------|
| 170 | HP0211        | <i>hcpA</i>                | <i>H. pylori</i> cysteine-rich protein A                 | Putative solenoid proteins                     |
| 171 | HP0235        | <i>hcpE</i>                | <i>H. pylori</i> cysteine-rich protein E                 | Putative solenoid proteins                     |
| 172 | HP0336        | <i>hcpB</i>                | <i>H. pylori</i> cysteine-rich protein B                 | Putative solenoid proteins                     |
| 173 | HP0519        | HP0519                     | Hypothetical Sel1-like protein                           | Putative solenoid proteins                     |
| 174 | HP0628        | HP0628                     | Hypothetical Sel1-like protein                           | Putative solenoid proteins                     |
| 175 | HP1098        | <i>hcpC</i>                | <i>H. pylori</i> cysteine-rich protein C                 | Putative solenoid proteins                     |
| 176 | HP1117        | <i>hcpX</i>                | <i>H. pylori</i> cysteine-rich protein X                 | Putative solenoid proteins                     |
| 177 | HP1124        | HP1124                     | Tetratricopeptide-like repeat protein                    | Putative solenoid proteins                     |
| 178 | HP0224        | <i>msrA/B</i>              | Peptide methionine sulfoxide reductase A/B               | Redox systems and the electron transport chain |
| 179 | HP0231        | <i>dsbG</i>                | Disulphide interchange protein G                         | Redox systems and the electron transport chain |
| 180 | HP0330        | <i>ilvC</i>                | Ketol-acid reductoisomerase                              | Redox systems and the electron transport chain |
| 181 | HP0377        | <i>dsbC</i>                | Disulphide interchange protein C                         | Redox systems and the electron transport chain |
| 182 | HP0389        | <i>sod</i>                 | Superoxide dismutase                                     | Redox systems and the electron transport chain |
| 183 | HP0390        | <i>tagD</i>                | Adhesin-thiol peroxidase D                               | Redox systems and the electron transport chain |
| 184 | HP0485        | HP0485                     | Catalase-like protein                                    | Redox systems and the electron transport chain |
| 185 | HP0824        | <i>trxA</i> or <i>trx1</i> | Thioredoxin A                                            | Redox systems and the electron transport chain |
| 186 | HP0825        | <i>trxB</i> or <i>trx2</i> | Thioredoxin reductase                                    | Redox systems and the electron transport chain |
| 187 | HP0875        | <i>katA</i>                | Catalase                                                 | Redox systems and the electron transport chain |
| 188 | HP1136        | HP1136                     | ATP synthase subunit b                                   | Redox systems and the electron transport chain |
| 189 | HP1161        | <i>fldA</i>                | Flavodoxin                                               | Redox systems and the electron transport chain |
| 190 | HP1212        | HP1212                     | ATP synthase subunit c                                   | Redox systems and the electron transport chain |
| 191 | HP1227        | HP1227                     | Cytochrome c-553                                         | Redox systems and the electron transport chain |
| 192 | HP1266        | HP1266                     | NADH-ubiquinone oxidoreductase, NQO3 subunit             | Redox systems and the electron transport chain |
| 193 | HP1458        | <i>trxC</i>                | Thioredoxin C                                            | Redox systems and the electron transport chain |
| 194 | HP1461        | HP1461                     | Cytochrome c551 peroxidase                               | Redox systems and the electron transport chain |
| 195 | HP0067        | <i>ureH</i>                | Urease accessory protein H                               | Stress survival                                |
| 197 | HP0068        | <i>ureG</i>                | Urease accessory protein G                               | Stress survival                                |
| 198 | HP0069        | <i>ureF</i>                | Urease accessory protein F                               | Stress survival                                |
| 199 | HP0070        | <i>ureE</i>                | Urease accessory protein E, metallochaperone             | Stress survival                                |
| 200 | HP0071        | <i>ureI</i>                | Acid-activated urea channel protein                      | Stress survival                                |
| 201 | HP0072        | <i>ureB</i>                | Urease beta subunit B, urea amidohydrolase               | Stress survival                                |
| 202 | HP0073        | <i>ureA</i>                | Urease alpha subunit A                                   | Stress survival                                |
| 203 | HP0082        | <i>tlpC</i>                | Transmembrane chemoreceptor C                            | Stress survival                                |
| 204 | HP0099        | <i>tlpA</i>                | Transmembrane chemoreceptor A                            | Stress survival                                |
| 205 | HP0103        | <i>tlpB</i>                | Transmembrane chemoreceptor B                            | Stress survival                                |
| 206 | HP0289        | <i>imaA</i>                | Immunomodulatory autotransporter A, vacA-like protein    | VacA and other toxins                          |
| 207 | HP0596        | <i>tip-α</i>               | Tumor necrosis factor α-inducing protein                 | VacA and other toxins                          |
| 208 | HP0609/HP0610 | <i>faaA</i>                | Flagella-associated autotransporter A, VacA-like protein | VacA and other toxins                          |

|                                            |             |                    |                                                                                                |                       |
|--------------------------------------------|-------------|--------------------|------------------------------------------------------------------------------------------------|-----------------------|
| 209                                        | HP0887      | <i>vacA</i>        | Vacuolating cytotoxin A                                                                        | VacA and other toxins |
| 210                                        | HP0922      | <i>vlpC</i>        | VacA-like protein C                                                                            | VacA and other toxins |
| <b>Outer Membrane Proteins (OMPs) [27]</b> |             |                    |                                                                                                |                       |
| 1                                          | HP0009      | <i>hopZ</i>        | <i>H. pylori</i> outer membrane porin (OMP) Z – Omp1                                           | Hop family            |
| 2                                          | HP0025      | <i>hopD</i>        | <i>H. pylori</i> outer membrane porin D / 2                                                    | Hop family            |
| 3                                          | HP0227      | <i>hopM</i>        | <i>H. pylori</i> outer membrane porin M / Omp5                                                 | Hop family            |
| 4                                          | HP0229      | <i>hopA</i>        | <i>H. pylori</i> outer membrane porin A / Omp6                                                 | Hop family            |
| 5                                          | HP0252      | <i>hopF</i>        | <i>H. pylori</i> outer membrane porin F / Omp7                                                 | Hop family            |
| 6                                          | HP0253/0254 | <i>hopG</i>        | <i>H. pylori</i> outer membrane porin G / Omp8                                                 | Hop family            |
| 7                                          | HP0477      | <i>hopJ</i>        | <i>H. pylori</i> outer membrane porin J / Omp12                                                | Hop family            |
| 8                                          | HP0638      | <i>hopH</i>        | <i>H. pylori</i> outer membrane porin H / Outer inflammatory protein (OipA) / Omp13            | Hop family            |
| 9                                          | HP0706      | <i>hopE</i>        | <i>H. pylori</i> outer membrane porin E / Omp15                                                | Hop family            |
| 10                                         | HP0722      | <i>hopO</i>        | <i>H. pylori</i> outer membrane porin O / Sialic acid binding adhesion B (SabB) / Omp16        | Hop family            |
| 11                                         | HP0725      | <i>hopP</i>        | <i>H. pylori</i> outer membrane porin P / Sialic acid binding adhesion A (SabA) / Omp17        | Hop family            |
| 12                                         | HP1243      | <i>babA (hopS)</i> | <i>H. pylori</i> outer membrane porin S / Blood group antigen-binding adhesin A (BabA) / Omp28 | Hop family            |
| 13                                         | HP0912      | <i>hopC</i>        | <i>H. pylori</i> outer membrane porin C / Adherence-associated lipoprotein A (AlpA) / Omp20    | Hop family            |
| 14                                         | HP0913      | <i>hopB</i>        | <i>H. pylori</i> outer membrane porin B / Adherence-associated lipoprotein B (AlpB) / Omp21    | Hop family            |
| 15                                         | HP0923      | <i>hopK</i>        | <i>H. pylori</i> outer membrane porin K / Omp22                                                | Hop family            |
| 16                                         | HP1156      | <i>hopI</i>        | <i>H. pylori</i> outer membrane porin I / Omp25                                                | Hop family            |
| 17                                         | HP1157      | <i>hopL</i>        | <i>H. pylori</i> outer membrane porin L / Omp26                                                | Hop family            |
| 18                                         | HP0896      | <i>babB (hopT)</i> | <i>H. pylori</i> outer membrane porin T / blood group antigen-binding adhesin B (BabB) / Omp19 | Hop family            |
| 19                                         | HP1177      | <i>hopQ</i>        | <i>H. pylori</i> outer membrane porin Q / Omp27                                                | Hop family            |
| 20                                         | HP1342      | <i>hopN</i>        | <i>H. pylori</i> outer membrane porin N / Omp29                                                | Hop family            |
| 21                                         | HP0317      | <i>hopU</i>        | <i>H. pylori</i> outer membrane porin U / Omp9                                                 | Hop family            |
| 22                                         | HP0078/0079 | <i>horA</i>        | <i>hop</i> related protein A / Omp3                                                            | Hor proteins          |
| 23                                         | HP0127      | <i>horB</i>        | <i>hop</i> related protein B / Omp4                                                            | Hor proteins          |
| 24                                         | HP0324      | <i>horC</i>        | <i>hop</i> related protein C / Omp10                                                           | Hor proteins          |
| 25                                         | HP1066      | <i>horD</i>        | <i>hop</i> related protein D                                                                   | Hor proteins          |
| 26                                         | HP0472      | <i>horE</i>        | <i>hop</i> related protein E / Omp11                                                           | Hor proteins          |
| 27                                         | HP0671      | <i>horF</i>        | <i>hop</i> related protein F / Omp14                                                           | Hor proteins          |
| 28                                         | HP0796      | <i>horG</i>        | <i>hop</i> related protein G                                                                   | Hor proteins          |
| 29                                         | HP1107      | <i>horH</i>        | <i>hop</i> related protein H / Omp23                                                           | Hor proteins          |
| 30                                         | HP1113      | <i>horI</i>        | <i>hop</i> related protein I                                                                   | Hor proteins          |
| 31                                         | HP1469      | <i>horJ</i>        | <i>hop</i> related protein J / Omp31                                                           | Hor proteins          |
| 32                                         | HP1501      | <i>horK</i>        | <i>hop</i> related protein K                                                                   | Hor proteins          |
| 33                                         | HP1395      | <i>horL</i>        | <i>hop</i> related protein L / Omp30                                                           | Hor proteins          |
| 34                                         | HP0209      | <i>hofA</i>        | <i>Helicobacter</i> OMP family protein A                                                       | Hof family            |
| 35                                         | HP1083      | <i>hofB</i>        | <i>Helicobacter</i> OMP family protein B                                                       | Hof family            |
| 36                                         | HP0486      | <i>hofC</i>        | <i>Helicobacter</i> OMP family protein C                                                       | Hof family            |
| 37                                         | HP0487      | <i>hofD</i>        | <i>Helicobacter</i> OMP family protein D                                                       | Hof family            |
| 38                                         | HP0782      | <i>hofE</i>        | <i>Helicobacter</i> OMP family protein E                                                       | Hof family            |
| 39                                         | HP0788      | <i>hofF</i>        | <i>Helicobacter</i> OMP family protein F                                                       | Hof family            |
| 40                                         | HP0914      | <i>hofG</i>        | <i>Helicobacter</i> OMP family protein G                                                       | Hof family            |
| 41                                         | HP1167      | <i>hofH</i>        | <i>Helicobacter</i> OMP family protein H                                                       | Hof family            |
| 42                                         | HP0710      | <i>homA</i>        | <i>Helicobacter</i> outer membrane protein A                                                   | Hom family            |

|    |             |               |                                                   |                     |
|----|-------------|---------------|---------------------------------------------------|---------------------|
| 43 | NA(JHP0870) | <i>homB</i>   | <i>Helicobacter</i> outer membrane protein B      | Hom family          |
| 44 | HP0373      | <i>homC</i>   | <i>Helicobacter</i> outer membrane protein C      | Hom family          |
| 45 | HP1453      | <i>homD</i>   | <i>Helicobacter</i> outer membrane protein D      | Hom family          |
| 46 | HP0686      | <i>fecA-1</i> | FecA-like protein A-1                             | iron-regulated OMPs |
| 47 | HP0807      | <i>fecA-2</i> | FecA-like protein A-2                             | iron-regulated OMPs |
| 48 | HP1400      | <i>fecA-3</i> | FecA-like protein A-3                             | iron-regulated OMPs |
| 49 | HP0876      | <i>frpB-1</i> | FrpB-like protein 1                               | iron-regulated OMPs |
| 50 | HP0915/0916 | <i>frpB-2</i> | FrpB-like protein 2                               | iron-regulated OMPs |
| 51 | HP1512      | <i>frpB-3</i> | FrpB-like protein 3                               | iron-regulated OMPs |
| 52 | HP0605      | <i>hefA</i>   | Efflux pump outer membrane protein A              | efflux pump OMPs    |
| 53 | HP0971      | <i>hefD</i>   | Efflux pump outer membrane protein D              | efflux pump OMPs    |
| 54 | HP1327      | <i>hefG</i>   | Efflux pump outer membrane protein G              | efflux pump OMPs    |
| 55 | HP0506      | <i>csd3</i>   | Caseinase                                         | Other OMPs          |
| 56 | HP0655      | <i>bamA</i>   | Outer membrane $\beta$ -barrel assembly component | Other OMPs          |
| 57 | HP0694      | <i>lpxR</i>   | Putative outer membrane protein                   | Other OMPs          |
| 58 | HP0726      | -             | Putative outer membrane protein                   | Other OMPs          |
| 59 | HP0358      | -             | Putative outer membrane protein                   | Other OMPs          |
| 60 | HP1467      | -             | Putative outer membrane protein                   | Other OMPs          |
| 61 | HP0325      | <i>flgH</i>   | Flagellar basal-body L-ring protein H             | Other OMPs          |
| 62 | HP0839      |               | Putative outer membrane protein                   | Other OMPs          |
| 63 | HP1125      | <i>palA</i>   | Putative outer membrane protein                   | Other OMPs          |
| 64 | HP1456      | <i>lpp20</i>  | Putative outer membrane protein                   | Other OMPs          |

<sup>a</sup> – gene that did not detected at all in *H. pylori*-Mon strains

<sup>b</sup>NA – not applicable, we used the gene from strain J99.



**Table S3.** *H. pylori* reference strains list

| No | Strain name   | Isolated country | Isolated place       | Subpopulations    | Reference                |
|----|---------------|------------------|----------------------|-------------------|--------------------------|
| 1  | SouthAfrica50 | South Africa     | Soweto, Bantu origin | hpAfrica2         | Duncan et al. 2013       |
| 2  | SouthAfrica20 | South Africa     | Soweto, Bantu origin | hpAfrica2         | Duncan et al. 2013       |
| 3  | SouthAfrica7  | South Africa     | Soweto, Bantu origin | hpAfrica2         | Duncan et al. 2013       |
| 4  | SA166A        | South Africa     | Ogies, Mpumalanga    | hpAfrica2         | Didelot et al. 2013      |
| 5  | SA303C        | South Africa     | Ogies, Mpumalanga    | hpAfrica2         | Didelot et al. 2013      |
| 6  | SA35A         | South Africa     | Ogies, Mpumalanga    | hspAfrica1SAfrica | Didelot et al. 2013      |
| 7  | SA158A        | South Africa     | Ogies, Mpumalanga    | hspAfrica1SAfrica | Didelot et al. 2013      |
| 8  | SA45A         | South Africa     | Ogies, Mpumalanga    | hspAfrica1SAfrica | Didelot et al. 2013      |
| 9  | SA46C         | South Africa     | Ogies, Mpumalanga    | hspAfrica1SAfrica | Didelot et al. 2013      |
| 10 | SA146A        | South Africa     | Ogies, Mpumalanga    | hspAfrica1SAfrica | Didelot et al. 2013      |
| 11 | GAMchjs114i   | Gambia           | n/a                  | hspAfrica1WAfrica | Human Microbiome Project |
| 12 | GAM231Ai      | Gambia           | n/a                  | hspAfrica1WAfrica | Human Microbiome Project |
| 13 | GAM260Bi      | Gambia           | n/a                  | hspAfrica1WAfrica | Human Microbiome Project |
| 14 | GAMchjs124i   | Gambia           | n/a                  | hspAfrica1WAfrica | Human Microbiome Project |
| 15 | GAMchjs117Ai  | Gambia           | n/a                  | hspAfrica1WAfrica | Human Microbiome Project |
| 16 | 26695_Tomb    | UK               | n/a                  | hspNEurope        | Tomb et al. 1997         |
| 17 | SSR4          | UK               | Dublin, Ireland      | hspNEurope        | Kaisa Thorell et al 2017 |
| 18 | SSR13         | UK               | Dublin, Ireland      | hspNEurope        | Kaisa Thorell et al 2017 |
| 19 | SSR8          | UK               | Dublin, Ireland      | hspNEurope        | Kaisa Thorell et al 2017 |
| 20 | HPAG1         | Sweden           | Kalix, Norrland      | hspNEurope        | Oh et al. 2006           |
| 21 | Keto01        | Russia           | Sulomai              | hspUral           | HEL_AA7957AA             |
| 22 | Keto65        | Russia           | Sulomai              | hspUral           | HEL_AA8054AA             |
| 23 | Keto23        | Russia           | Sulomai              | hspUral           | HEL_AA8174AA             |
| 24 | Khanty39      | Russia           | Muzhi, Shurishkari   | hspUral           | HEL_AA7342AA             |
| 25 | Nentsy32      | Russia           | Novi-port            | hspUral           | HEL_AA2429AA             |
| 26 | NAB47         | India            | n/a                  | hspIndia          | Kaisa Thorell et al 2017 |
| 27 | NAK7          | India            | n/a                  | hspIndia          | Kaisa Thorell et al 2017 |
| 28 | SNT49         | India            | Santal tribe         | hspIndia          | Kaisa Thorell et al 2017 |
| 29 | India7        | India            | n/a                  | hspIndia          | Kaisa Thorell et al 2017 |
| 30 | Myanmar51     | Myanmar          | n/a                  | hspIndia          | Kaisa Thorell et al 2017 |
| 31 | HP15050_WA    | Iran             | n/a                  | hspSahul          | Kaisa Thorell et al 2017 |
| 32 | ausabrJ05     | Australia        | Aboriginal           | hspSahul          | Kaisa Thorell et al 2017 |
| 33 | HP15060       | Afghanistan      | n/a                  | hspSahul          | Kaisa Thorell et al 2017 |
| 34 | HP15035_WA    | Iran             | n/a                  | hspSahul          | Kaisa Thorell et al 2017 |
| 35 | Neuguinea56   | Papua New Guinea | Highlander           | hspSahul          | Kaisa Thorell et al 2017 |
| 36 | Arg-53RA1     | Argentina        | Buenos Aires City    | hspSWEurope       | PRJNA601302              |
| 37 | CL-MASP       | Chile            | n/a                  | hspSWEurope       | PRJNA601302              |
| 38 | Pt-8376       | Portugal         | Porto                | hspSWEurope       | PRJNA601302              |

|    |           |             |                       |                       |                          |
|----|-----------|-------------|-----------------------|-----------------------|--------------------------|
| 39 | Pt-7757   | Portugal    | Sta Maria Feira       | hspSWEurope           | PRJNA601302              |
| 40 | VE-HV076  | Venezuela   | Caracas               | hspSWEurope           | PRJNA601302              |
| 41 | Todzha110 | Russia      | Todzha                | hspAltai              | HEL_AA7233AA             |
| 42 | Todzha114 | Russia      | Todzha                | hspAltai              | HEL_AA7967AA             |
| 43 | Todzha120 | Russia      | Todzha                | hspAltai              | HEL_AA8146AA             |
| 44 | TUVAB11   | Russia      | Kyzyl                 | hspAltai              | HEL_AA7241AA             |
| 45 | TUVAB24   | Russia      | Kyzyl                 | hspAltai              | HEL_AA7521AA             |
| 46 | CAN-005   | Canada      | Northwest Territories | hspIndigenousNAmerica | PRJNA601302              |
| 47 | CAN-011   | Canada      | Northwest Territories | hspIndigenousNAmerica | PRJNA601302              |
| 48 | CAN-095   | Canada      | Northwest Territories | hspIndigenousNAmerica | PRJNA601302              |
| 49 | CAN-258   | Canada      | Northwest Territories | hspIndigenousNAmerica | PRJNA601302              |
| 50 | CAN-136   | Canada      | Northwest Territories | hspIndigenousNAmerica | PRJNA601302              |
| 51 | Puno120   | Peru        | Puno                  | hspIndigenousSAmerica | Kaisa Thorell et al 2017 |
| 52 | Shi417    | Peru        | Shimaa village        | hspIndigenousSAmerica | Kaisa Thorell et al 2017 |
| 53 | Shi112    | Peru        | Shimaa village        | hspIndigenousSAmerica | Kaisa Thorell et al 2017 |
| 54 | Shi169    | Peru        | Shimaa village        | hspIndigenousSAmerica | Kaisa Thorell et al 2017 |
| 55 | Cuz20     | Peru        | Cuzco                 | hspIndigenousSAmerica | Kaisa Thorell et al 2017 |
| 56 | 51        | South Korea | n/a                   | hpEastAsia            | Kaisa Thorell et al 2017 |
| 57 | HLJHP256  | China       | n/a                   | hpEastAsia            | Kaisa Thorell et al 2017 |
| 58 | UM038     | Malaysia    | n/a                   | hpEastAsia            | Rehvathy et al. 2013     |
| 59 | HLJHP271  | China       | n/a                   | hpEastAsia            | Kaisa Thorell et al 2017 |
| 60 | Yangon222 | Myanmar     | n/a                   | hpEastAsia            | Kaisa Thorell et al 2017 |
| 61 | SU2       | Sudan       | n/a                   | HpNEAfrica            | HEL_AA7286AA             |
| 62 | NIGH2494  | Nigeria     | n/a                   | HpNEAfrica            | HEL_AA1182AA             |
| 63 | ETH04     | Ethiopia    | n/a                   | HpNEAfrica            | HEL_AA2420AA             |
| 64 | ETH09     | Ethiopia    | n/a                   | HpNEAfrica            | HEL_AA2422AA             |
| 65 | Somalia3  | Somalia     | n/a                   | HpNEAfrica            | Duncan et al. 2013       |

**Table S4.** General characteristics of study patients

| <b>Variables</b>                                 | <b>Total of 223 patients</b>      |
|--------------------------------------------------|-----------------------------------|
| <b>Gender</b>                                    |                                   |
| Female                                           | 150 (70.9%)                       |
| Male                                             | 65 (29.1%)                        |
| <b>Mean age, years <math>\pm</math> SE</b>       | <b>45.2 <math>\pm</math> 14.0</b> |
| <b>Age groups</b>                                |                                   |
| 18-29 years                                      | 34 (15.2%)                        |
| 30-49 years                                      | 102 (45.7%)                       |
| 50-69 years                                      | 75 (33.6%)                        |
| >69 years                                        | 12 (5.4%)                         |
| <b>Sampling place</b>                            |                                   |
| Ulaanbaatar                                      | 83 (37.2%)                        |
| Khentii province                                 | 45 (20.2%)                        |
| Umnugovi province                                | 37 (16.6%)                        |
| Khuvsgul province                                | 30 (13.5%)                        |
| Uvs province                                     | 28 (12.6%)                        |
| <b>Disease status</b>                            |                                   |
| Non-atrophic gastritis (NAG)                     | 120 (53.8%)                       |
| Peptic ulcer disease (PUD)                       | 9 (4.0%)                          |
| Atrophic gastritis/Intestinal metaplasia (AG/IM) | 78 (35.0%)                        |
| Gastric cancer (GC)                              | 16 (7.2%)                         |

**Figure S1.** Diverse virulence factor genes by disease status (A) and *H. pylori* subgroups (B). The *p* values were used to analyze the differences in the percentage of strains positive for the considered genes between disease status or two subgroups by Chi-Square test or Fisher's exact test.

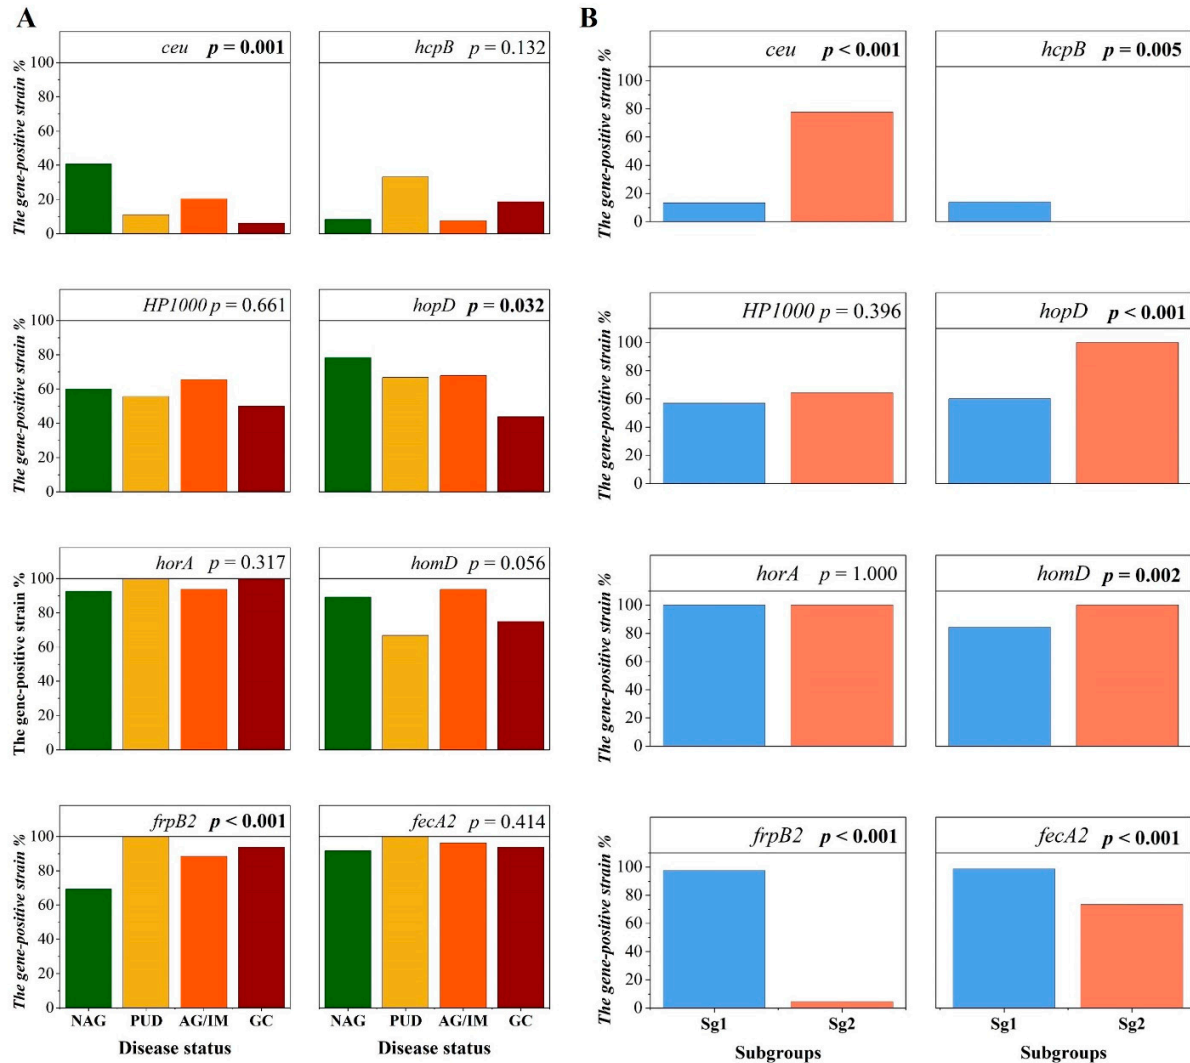

**Table S5.** Detected the allele types of *vacA* found in *H. pylori*-Mon

| Simple s-i-m | Genotypes       | Number     | Percentages  |
|--------------|-----------------|------------|--------------|
| s1-i1-m1     | s1i1d1m1c1n1    | 98         | 43.9%        |
|              | s1i1d1m1c1n2    | 2          | 0.9%         |
|              | s1i1d1m1c2n1    | 3          | 1.3%         |
|              | s1i1d1m1c2n2    | 14         | 6.3%         |
|              | s1i1d2m1c1n1    | 5          | 2.2%         |
|              | s1i1d2m1c2n2    | 2          | 0.9%         |
|              | <b>subtotal</b> | <b>124</b> | <b>55.6%</b> |
| s1-i1-m2     | s1i1d1m2c2n1    | 1          | 0.4%         |
|              | s1i1d1m2c2n2    | 12         | 5.4%         |
|              | s1i1d2m2c2n2    | 5          | 2.2%         |
|              | <b>subtotal</b> | <b>18</b>  | <b>8.1%</b>  |

|                 |                 |            |              |
|-----------------|-----------------|------------|--------------|
| s1-i3-m2        | s1i3d1m2c2n2    | 2          | 0.9%         |
|                 | s1i3d2m2c1n1    | 1          | 0.4%         |
|                 | s1i3d2m2c2n1    | 1          | 0.4%         |
|                 | s1i3d2m2c2n2    | 27         | 12.1%        |
|                 | <b>subtotal</b> | <b>31</b>  | <b>13.9%</b> |
| s2-i3-m2        | s2i3d1m2c2n2    | 1          | 0.4%         |
|                 | s2i3d2m2c2n1    | 3          | 1.3%         |
|                 | s2i3d2m2c2n2    | 35         | 15.7%        |
|                 | <b>subtotal</b> | <b>39</b>  | <b>17.5%</b> |
| other           | s1i2d2m1c1n1    | 1          | 0.4%         |
|                 | s1i3d1m1c2n2    | 1          | 0.4%         |
|                 | s1i3d2m1c2n2    | 1          | 0.4%         |
|                 | s2i2d2m2c1n1    | 1          | 0.4%         |
|                 | s2i2d2m2c2n2    | 5          | 2.2%         |
|                 | s2i3d2m1c2n2    | 2          | 0.9%         |
| <b>subtotal</b> |                 | <b>11</b>  | <b>4.9%</b>  |
| <b>Total</b>    |                 | <b>223</b> | <b>100%</b>  |

**Table S6.** Genotyping of selected OMP and virulence factor genes and *H. pylori* subgroups.

| Genes       | Genotypes                 | Sg1<br>(n=158) | Sg2<br>(n=45) | Total<br>(n=203) | <i>P</i> <sup>a</sup> |
|-------------|---------------------------|----------------|---------------|------------------|-----------------------|
| <i>cagA</i> | AB <sup>1</sup>           | 2 (1.3%)       | 0             | 2 (1.0%)         | < 0.001               |
|             | ABC <sup>2b</sup>         | 92 (58.2%)     | 0             | 92 (45.3%)       |                       |
|             | ABCn <sup>3b</sup>        | 54 (34.2%)     | 0             | 54 (26.6%)       |                       |
|             | ABD <sup>4</sup>          | 4 (2.5%)       | 0             | 4 (2.0%)         |                       |
|             | Negative <sup>b</sup>     | 6 (3.8%)       | 45 (100%)     | 51 (25.1%)       |                       |
| <i>vacA</i> | sli1m1 <sup>b</sup>       | 118 (74.7%)    | 0             | 118 (58.1%)      | < 0.001               |
|             | sli1m2 <sup>b</sup>       | 17 (10.8%)     | 0             | 17 (8.4%)        |                       |
|             | s1i3m2                    | 18 (11.4%)     | 3 (6.7%)      | 21 (10.3%)       |                       |
|             | s2i3m2 <sup>b</sup>       | 1 (0.5%)       | 37 (82.2%)    | 38 (18.7%)       |                       |
|             | other <sup>b</sup>        | 4 (2.5%)       | 5 (11.1%)     | 9 (4.4%)         |                       |
| <i>htrA</i> | S variant <sup>b</sup>    | 151 (95.6%)    | 20 (44.4%)    | 171 (84.2%)      | < 0.001               |
|             | L variant <sup>b</sup>    | 7 (4.4%)       | 25 (55.6%)    | 32 (15.8%)       |                       |
| <i>iceA</i> | Type 1 <sup>b</sup>       | 84 (53.2%)     | 7 (15.6%)     | 91 (44.8%)       | < 0.001               |
|             | Type 2A                   | 6 (3.8%)       | 2 (4.4%)      | 8 (3.9%)         |                       |
|             | Type 2B <sup>b</sup>      | 9 (5.7%)       | 14 (31.1%)    | 23 (11.3%)       |                       |
|             | Type 2C <sup>b</sup>      | 13 (11.5%)     | 17 (37.8%)    | 30 (14.8%)       |                       |
|             | Type 2D <sup>b</sup>      | 46 (29.1%)     | 4 (8.9%)      | 50 (24.6%)       |                       |
|             | Negative                  | 0              | 1 (2.2%)      | 1 (0.5%)         |                       |
| <i>babA</i> | AD2                       | 2 (1.3%)       | 1 (2.2%)      | 3 (1.5%)         | 0.377                 |
|             | AD3                       | 54 (34.2%)     | 10 (22.2%)    | 64 (31.5%)       |                       |
|             | AD4                       | 99 (62.7%)     | 32 (71.1%)    | 131 (64.5%)      |                       |
|             | Negative                  | 3 (1.9%)       | 2 (4.4%)      | 5 (2.5%)         |                       |
| <i>babB</i> | BD1 <sup>b</sup>          | 46 (29.1%)     | 2 (4.4%)      | 48 (23.6%)       | < 0.001               |
|             | BD2                       | 67 (42.4%)     | 12 (26.7%)    | 79 (38.9%)       |                       |
|             | BD3                       | 24 (15.2%)     | 4 (8.9%)      | 28 (13.8%)       |                       |
|             | unclassified <sup>b</sup> | 17 (10.8%)     | 11 (24.4%)    | 28 (13.8%)       |                       |

|               |                          |             |            |             |         |
|---------------|--------------------------|-------------|------------|-------------|---------|
|               | Negative <sup>b</sup>    | 4 (2.5%)    | 16 (35.6%) | 20 (9.9%)   |         |
|               | Type I <sup>b</sup>      | 147 (93.0%) | 0          | 147 (72.4%) |         |
| <i>hopQ</i>   | Type II <sup>b</sup>     | 5 (3.2%)    | 45 (100%)  | 50 (24.6%)  | < 0.001 |
|               | Type I/II                | 6 (3.8%)    | 0          | 6 (3.0%)    |         |
|               | Type I                   | 150 (94.9%) | 24 (55.8%) | 174 (85.7%) |         |
| <i>hopZ</i>   | Type II                  | 8 (5.1%)    | 21 (46.7%) | 29 (14.3%)  | 0.121   |
|               | Present                  | 130 (82.3%) | 45 (100%)  | 175 (86.2%) |         |
| <i>sabA</i>   | Negative                 | 28 (17.7%)  | 0          | 28 (13.8%)  | < 0.001 |
|               | Present                  | 131 (82.9%) | 0          | 131 (64.5%) |         |
| <i>sabB</i>   | Negative                 | 27 (17.1%)  | 45 (100%)  | 72 (35.5%)  | < 0.001 |
|               | <i>homA</i> <sup>b</sup> | 57 (36.1%)  | 36 (80.0%) | 93 (45.8%)  |         |
|               | <i>homB</i> <sup>b</sup> | 90 (57.0%)  | 8 (17.8%)  | 98 (48.3%)  |         |
| <i>homA/B</i> | <i>homA/B</i>            | 7 (4.4%)    | 0          | 7 (3.4%)    | < 0.001 |
|               | <i>homI</i>              | 4 (2.5%)    | 1 (2.2%)   | 5 (2.5%)    |         |

<sup>1</sup>AB (AB *n* = 1, AB<sup>3</sup>B *n* = 1). <sup>2</sup>ABC (ABC *n* = 90, AB<sup>3</sup>BC *n* = 1, AABC *n* = 1). <sup>3</sup>ABC<sub>n</sub> (ABCC *n* = 51, ABCCC *n* = 3). <sup>4</sup>ABD (ABD *n* = 2, ABBD *n* = 1, ABDC *n* = 1). <sup>a</sup>Global *p* value between subgroups was assessed by Chi-Square test. <sup>b</sup>Adjusted *p* < 0.05 versus NAG group was determined by Fisher's exact test (Bonferroni method). Sg1 = subgroup 1, Sg2 = subgroup 2.

**Table S7.** Determination of the functional status of OMP genes and their association with disease groups and *H. pylori* subgroups.

| Genes        | Status   | NAG<br><i>n</i> (%) | PUD<br><i>n</i> (%)   | AG/IM<br><i>n</i> (%)  | GC<br><i>n</i> (%)    | Total <i>n</i> (%) | <i>P</i> <sup>a</sup> | Sg1<br><i>n</i> (%) | Sg2<br><i>n</i> (%)    | Total <i>n</i> (%) | <i>P</i> <sup>a</sup> |
|--------------|----------|---------------------|-----------------------|------------------------|-----------------------|--------------------|-----------------------|---------------------|------------------------|--------------------|-----------------------|
| <i>oipA</i>  | On       | 82 (68.3)           | 9 (100) <sup>b</sup>  | 69 (88.5) <sup>b</sup> | 16 (100) <sup>b</sup> | 176 (78.9)         | < 0.001               | 153 (96.8)          | 4 (8.9)                | 157 (77.3)         | < 0.001               |
|              | Off      | 38 (31.7)           | 0 (0) <sup>b</sup>    | 9 (11.5) <sup>b</sup>  | 0 (0) <sup>b</sup>    | 47 (21.1)          |                       | 5 (3.2)             | 41 (91.1)              | 46 (22.7)          |                       |
| <i>babB</i>  | On       | 63 (52.5)           | 4 (44.4)              | 43 (55.1)              | 11 (68.8)             | 121 (54.3)         | 0.305                 | 98 (62.0)           | 9 (20.0) <sup>b</sup>  | 107 (52.7)         | < 0.001               |
|              | Off      | 44 (36.7)           | 5 (55.6)              | 26 (33.3)              | 5 (31.3)              | 80 (35.9)          |                       | 56 (35.4)           | 19 (42.2)              | 75 (36.9)          |                       |
|              | Negative | 13 (10.8)           | 0 (0)                 | 9 (11.5)               | 0 (0)                 | 22 (9.9)           |                       | 4 (2.5)             | 17 (37.8) <sup>b</sup> | 21 (10.3)          |                       |
| <i>sabA</i>  | On       | 64 (53.3)           | 4 (44.4)              | 39 (50.0)              | 9 (56.3)              | 116 (52.0)         | 0.950                 | 67 (42.4)           | 40 (88.9) <sup>b</sup> | 107 (52.7)         | < 0.001               |
|              | Off      | 43 (35.8)           | 3 (33.3)              | 27 (34.6)              | 5 (31.3)              | 78 (35.0)          |                       | 63 (39.9)           | 5 (11.1) <sup>b</sup>  | 68 (33.5)          |                       |
|              | Negative | 13 (10.8)           | 2 (22.2)              | 12 (15.4)              | 2 (12.5)              | 29 (13.0)          |                       | 28 (17.7)           | 0 (0) <sup>b</sup>     | 28 (13.8)          |                       |
| <i>sabB</i>  | On       | 23 (19.2)           | 3 (33.3) <sup>b</sup> | 27 (34.6) <sup>b</sup> | 8 (50.0) <sup>b</sup> | 61 (27.4)          | 0.003                 | 59 (37.3)           | 0 (0) <sup>b</sup>     | 59 (29.1)          | < 0.001               |
|              | Off      | 35 (29.2)           | 4 (44.4)              | 28 (35.9)              | 6 (37.5)              | 73 (32.7)          |                       | 72 (45.6)           | 0 (0) <sup>b</sup>     | 72 (35.5)          |                       |
|              | Negative | 62 (51.7)           | 2 (22.2) <sup>b</sup> | 23 (29.5) <sup>b</sup> | 2 (12.5) <sup>b</sup> | 89 (39.9)          |                       | 27 (17.1)           | 45 (100) <sup>b</sup>  | 72 (35.5)          |                       |
| <i>hopZ</i>  | On       | 43 (35.8)           | 3 (33.3)              | 28 (35.9)              | 4 (25.0)              | 78 (35.0)          | 0.845                 | 56 (35.4)           | 17 (37.8)              | 73 (36.0)          | 0.773                 |
|              | Off      | 77 (64.2)           | 6 (66.7)              | 50 (64.1)              | 12 (75.0)             | 145 (65.0)         |                       | 102 (64.6)          | 28 (62.2)              | 130 (64.0)         |                       |
| <b>Total</b> |          | 120 (100)           | 9 (100)               | 78 (100)               | 16 (100)              | 223 (100)          |                       | 158 (100)           | 45 (100)               | 203 (100)          |                       |

<sup>a</sup>Global *p* values between disease groups or subgroups were assessed by Chi-Square test or Fisher Exact test. <sup>b</sup>Adjusted *p* < 0.05 versus NAG group or Sg1 was determined by Fisher's exact test (Bonferroni method). Sg1 = subgroup 1, Sg2 = subgroup 2, OMP = outer membrane protein, NAG = non-atrophic gastritis, PUD = peptic ulcer disease, AG/IM = atrophic gastritis / intestinal metaplasia, GC = gastric cancer, Sg1 = subgroup 1, Sg2 = subgroup 2.

**Table S8.** Distribution of T4SS components in *H. pylori* subgroups.

| T4SS          | Genotypes                                           |                                   | Sg1<br>(n=158) | Sg2<br>(n=45) | Total<br>(n=203) | P <sup>a</sup> |
|---------------|-----------------------------------------------------|-----------------------------------|----------------|---------------|------------------|----------------|
| <i>cagPAI</i> | Presence <sup>§</sup>                               | Y                                 | 153 (96.8%)    | 1 (2.2%)      | 154 (75.9%)      | <0.001         |
|               |                                                     | N                                 | 5 (3.2%)       | 44 (97.8%)    | 49 (24.1%)       |                |
|               | Completeness <sup>§§</sup>                          | Y                                 | 151 (95.6%)    | 0             | 151 (74.4%)      | <0.001         |
|               |                                                     | N                                 | 2 (1.3%)       | 1 (2.2%)      | 3 (1.5%)         |                |
|               | <i>cagA</i> presence                                | Y                                 | 152 (96.2%)    | 0             | 152 (74.9%)      | <0.001         |
|               |                                                     | N                                 | 6 (3.8%)       | 45 (100%)     | 51 (25.1%)       |                |
| <i>comB</i>   | Presence <sup>§</sup> and completeness <sup>§</sup> | Y                                 | 158 (100%)     | 45 (100%)     | 203 (100%)       | -              |
|               |                                                     | N                                 | 0              | 0             | 0                |                |
| <i>tfs3</i>   | Presence <sup>§</sup>                               | Y                                 | 126 (79.7%)    | 17 (37.8%)    | 143 (70.4%)      | <0.001         |
|               |                                                     | N                                 | 32 (20.3%)     | 28 (62.2%)    | 60 (29.6%)       |                |
|               | Completeness <sup>§§</sup>                          | Y                                 | 18 (11.4%)     | 10 (22.2%)    | 28 (13.8%)       | <0.001         |
|               |                                                     | N                                 | 108 (68.4%)    | 7 (15.6%)     | 115 (56.7%)      |                |
|               | <i>ctkA</i>                                         | Y                                 | 79 (50.0%)     | 2 (4.4%)      | 81 (39.9%)       | <0.001         |
|               |                                                     | N                                 | 79 (50.0%)     | 43 (95.6%)    | 122 (60.1%)      |                |
| <i>tfs4</i>   | Presence <sup>§</sup>                               | Y                                 | 148 (93.7%)    | 34 (75.6%)    | 182 (89.7%)      | 0.001          |
|               |                                                     | N                                 | 10 (6.3%)      | 11 (24.4%)    | 21 (10.3%)       |                |
|               | Completeness <sup>§§</sup>                          | Y                                 | 20 (12.7%)     | 26 (57.8%)    | 46 (22.7%)       | <0.001         |
|               |                                                     | N                                 | 128 (81.0%)    | 8 (17.8%)     | 136 (67.0%)      |                |
|               | <i>dupA</i>                                         | Y                                 | 18 (11.4%)     | 23 (51.1%)    | 41 (20.2%)       | <0.001         |
|               |                                                     | N                                 | 140 (88.6%)    | 22 (48.9%)    | 162 (79.8%)      |                |
|               | Type                                                | <i>tfs4a</i> <sup>b</sup>         | 3 (1.9%)       | 5 (11.1%)     | 8 (3.9%)         | <0.001         |
|               |                                                     | <i>tfs4b</i> <sup>b</sup>         | 14 (8.9%)      | 18 (40.0%)    | 32 (15.8%)       |                |
|               |                                                     | <i>tfs4c</i>                      | 2 (1.3%)       | 2 (4.4%)      | 4 (2.0%)         |                |
|               |                                                     | <i>tfs4-other</i> <sup>§§§b</sup> | 129 (81.6%)    | 9 (20.0%)     | 138 (68.0%)      |                |
| Combinations  | <i>cagPAI+tfs3</i>                                  |                                   | 121 (79.1%)    | 1 (100%)      | 122 (79.2%)      | 0.607          |
|               | <i>cagPAI+tfs4</i>                                  |                                   | 143 (93.5%)    | 1 (100%)      | 144 (93.5%)      | 0.791          |
|               | <i>tfs3+tfs4</i>                                    |                                   | 118 (93.7%)    | 15 (88.2%)    | 133 (93.0%)      | 0.411          |
|               | <i>tfs3+tfs4a</i> <sup>b</sup>                      |                                   | 1 (0.8%)       | 1 (5.9%)      | 2 (1.4%)         | 0.001          |
|               | <i>tfs3+tfs4b</i> <sup>b</sup>                      |                                   | 14 (11.1%)     | 7 (41.2%)     | 21 (14.7%)       |                |
|               | <i>tfs3+tfs4c</i>                                   |                                   | 2 (1.6%)       | 1 (5.9%)      | 3 (2.1%)         |                |
|               | All T4SS <sup>b</sup>                               |                                   | 113 (71.5%)    | 1 (2.2%)      | 114 (56.2%)      |                |

<sup>§</sup>The presence of the T4SS was established by the assessment of the existence of either one of the following genes: *xerT*, *virB2*, *virB3*, *virB4*, *virB6*, *virB7*, *virB8*, *virB9*, *virB10*, *virB11*, *virD2*, *virD4*, and *topA*. For *cagPAI* presence was established by the assessment of the existence of either one of the following genes: *virB1*, *virB2*, *virB3*, *virB4*, *virB6*, *virB7*, *virB8*, *virB9*, *virB10*, *virB11*, and *virD4*. <sup>§§</sup>The presence of all *virB2*, *virB3*, *virB4*, *virB6*, (in the case of *cagPAI*, *virB7* is included), *virB8*, *virB9*, *virB10*, *virB11*, *virD2*, and *virD4* genes were used to determine the level of completeness of each T4SS. <sup>§§§</sup>unclassified and incomplete *tfs4* type. <sup>a</sup>Global *p* value between subgroups was assessed by Fisher's exact test or Chi square test. <sup>b</sup>Adjusted *p* < 0.05 versus subgroups was determined by Fisher's exact test (Bonferroni method). Y: yes, N: no. The global *p* value between disease groups were assessed by Chi-Square test. Sg1 = subgroup 1, Sg2 = subgroup 2



**Figure S2. (A)** Pairwise correlations among the presence of virulence determinants were assessed using Pearson's correlation coefficient, and the results were adjusted for multiple testing using the Bonferroni method. Red color indicated the positive, blue color indicated negative correlation between the variables. **(B)** Graphic representation of significant virulence determinants linked to gastric diseases in *H. pylori*-Mon strains by use of heatmap.

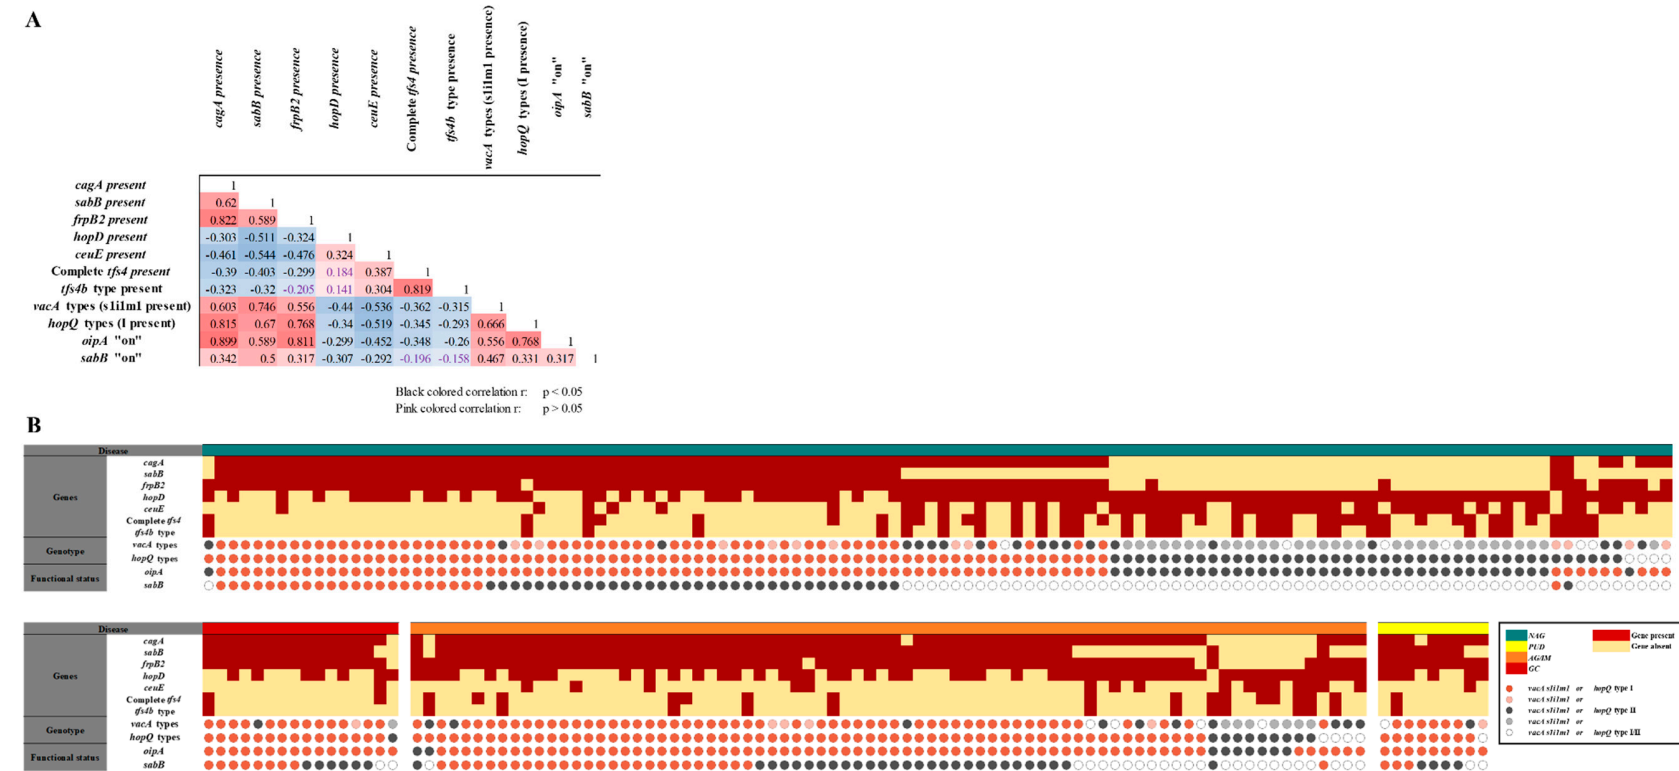

**Figure S3.** The GWAS Q-Q plot matched the importance of the SNPs and k-mers to the respective plots. The dot represents a SNP (A), and k-mer (B). Both axis represent  $p$  – significance level.

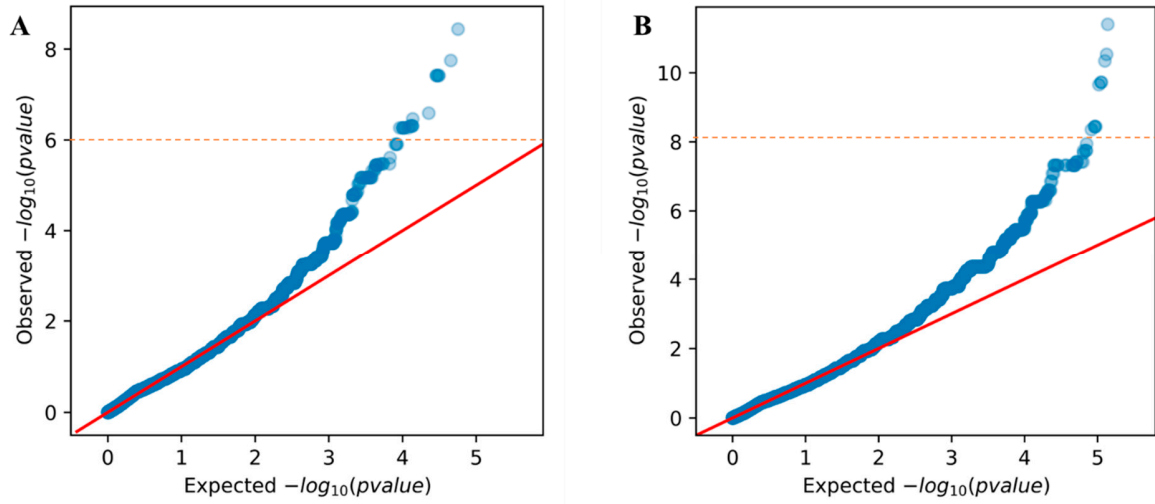

**Table S9.** Significant synonymous SNPs and kmers for GC were determined in genome-wide association studies of 158 *H. pylori* strains from Sg1.

| Types | <i>P</i>               | Gene locus in 26695 | Gene name        | Position in the genome | Position in the gene | Safe genotype      | Risk genotype                                                                 | Frequency of Non-GC/GC, % | Predicted function                                            |
|-------|------------------------|---------------------|------------------|------------------------|----------------------|--------------------|-------------------------------------------------------------------------------|---------------------------|---------------------------------------------------------------|
| SNP   | 3.80x10 <sup>-9</sup>  | HP0502              | <i>hpyAXII</i>   | 531001                 | 765                  | A                  | G                                                                             | 3.5/40.0                  | R-M system, adenine methyltransferase                         |
| SNP   | 3.44x10 <sup>-7</sup>  | HP0463              | hyp <sup>a</sup> | 482078                 | 705                  | G                  | A                                                                             | 6.3/46.7                  | R-M system type I, SAM-dependent DNA methyltransferase        |
| SNP   | 5.39x10 <sup>-7</sup>  | HP0465              | hyp <sup>a</sup> | 487322                 | 564                  | A                  | G                                                                             | 2.8/33.3                  | motility associated factor glycosyltransferase family protein |
| SNP   | 5.39x10 <sup>-7</sup>  | HP0967              | <i>vapD</i>      | 1026586                | 147                  | G                  | A                                                                             | 2.8/33.3                  | endoribonuclease                                              |
| k-mer | 4.49x10 <sup>-11</sup> | HP0193              | <i>frdC</i>      | 200376-200412          | 366-402              | other <sup>b</sup> | AAACCCGGTGAGG<br>GCTTGAATAAACCA<br>CAAACCTCGTA                                | 8.4/66.7                  | fumarate reductase cytochrome b-556 subunit                   |
| k-mer | 1.87x10 <sup>-10</sup> | HP0690              | <i>fadA</i>      | 741654                 | 1095                 | G                  | A                                                                             | 2.1/40.0                  | acetyl-CoA acetyltransferase                                  |
| k-mer | 3.62x10 <sup>-9</sup>  | HP1294              | <i>rpsD</i>      | 1369068-1369071        | 300-303              | GGAT               | AGAC                                                                          | 2.8/40.0                  | 30S ribosomal protein S4                                      |
| k-mer | 3.80x10 <sup>-8</sup>  | HP0609              | <i>faaA</i>      | 655274                 | 8017                 | C                  | T                                                                             | 2.1/40.0                  | vacuolating cytotoxin domain-containing protein               |
| k-mer | 3.80x10 <sup>-8</sup>  | HP0502              | hyp <sup>a</sup> | 530972-531032          | 735-795              | other <sup>b</sup> | TTTTTTAAAAGATA<br>AAAGAGTGCGTTT<br>GGAGTATTTTAAAA<br>AATTGTTTCAAGGA<br>CACCTT | 2.1/40.0                  | adenine methyltransferase                                     |

\*Hypothetical protein gene. <sup>b</sup>The other motifs than risk genotype-motif considered as safe genotype.
