# Supplementary material for: 海のピラミッド : 構造評論(構造パースペクティブ)
Source: MDPI journal article supplement (doi:10.3390/cancers15184528), 1991-05-20
Supplement: s1 [file s1]

[illegible]
